# Supplementary material for: A sensitive electrochemical sensor based on ZIF-8–acetylene black–chitosan nanocomposites for rutin detection
Source: Royal Society of Chemistry journal article supplement (doi:10.1039/c8ra06452k), 2018-01-01
Supplement: c8ra06452k1.pdf [file c8ra06452k1.pdf]

Electronic Supporting Material

**A sensitive electrochemical sensor based on**

**ZIF-8-acetyleneblack-chitosan nanocomposites for rutin detection**

**Ya-feng Jin,<sup>ab</sup> Chuang-ye Ge,<sup>b</sup> Xiao-bo Li,<sup>bc</sup> Miao Zhang,<sup>b</sup> Guang-ri Xu,<sup>b\*</sup> Dong-hao Li<sup>a\*</sup>**

<sup>a</sup>Key Laboratory of Natural Resources of the Changbai Mountain and Functional Molecular (Yanbian University), Ministry of Education, Park Road 977, Yanji City, Jilin Province, 133002, China

<sup>b</sup>Department of Chemistry and Chemical Engineering, Henan Institute of Science and Technology, Xinxiang 453003, China

<sup>c</sup>State Key Laboratory of Luminescent Materials and Devices, South China University of Technology Guangzhou 510641, P.R.China

\*Corresponding author: Dong-hao Li, [dhli6510@126.com](mailto:dhli6510@126.com);

Guang-ri Xu, [xugr70@163.com](mailto:xugr70@163.com), +86-0373-3693027

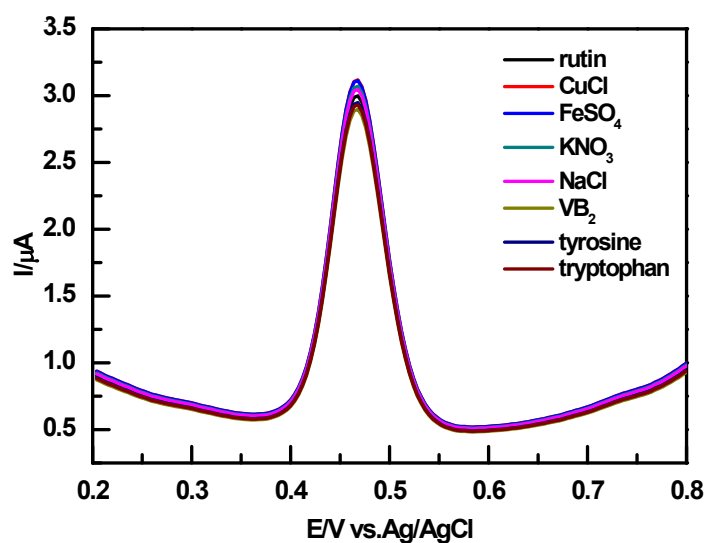

**Fig. S1.** The selectivity of ZIF-8-AB-CS/GCE sensor towards 5  $\mu\text{M}$  rutin in 0.1 M PBS (pH 3) containing 500  $\mu\text{M}$  electroactive substance respectively, scan rate 100  $\text{mV s}^{-1}$ .

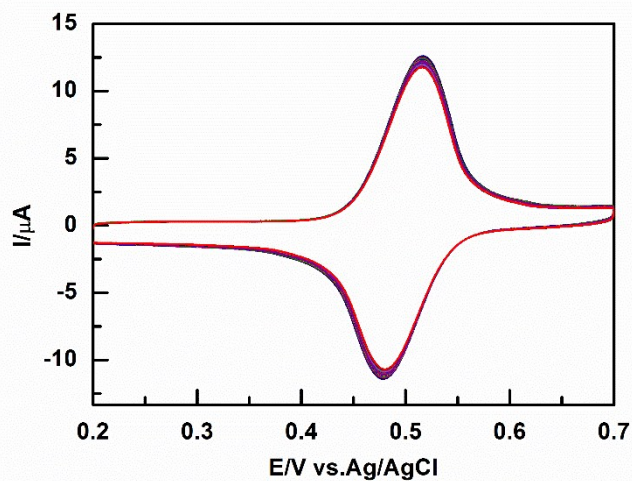

**Fig. S2.** CVs of ZIF-8-AB-CS/GCE in 0.1 M PBS containing 50  $\mu\text{M}$  rutin (pH 3) scan for 15 circles successively. Scan rate: 100  $\text{mV s}^{-1}$

**Table S1.** Effects of some electroactive substance on rutin detection at ZIF-8-AB-CS/GCE sensor in 0.1 M PBS (pH 3), scan rate 100 mV s<sup>-1</sup>.

| Co-existing species           | Concentration/uM | Relative Error% |
|-------------------------------|------------------|-----------------|
| Cu <sup>+</sup>               | 500              | 4.24            |
| Fe <sup>2+</sup>              | 500              | 3.81            |
| K <sup>+</sup>                | 500              | 2.40            |
| Na <sup>+</sup>               | 500              | 1.69            |
| Cl <sup>-</sup>               | 500              | 3.11            |
| SO <sub>4</sub> <sup>2-</sup> | 500              | 4.24            |
| NO <sub>3</sub> <sup>-</sup>  | 500              | 3.81            |
| VB <sub>2</sub>               | 500              | -3.39           |
| Tyro                          | 500              | -1.69           |
| Tryp                          | 500              | -2.26           |

**Table S2.** Determination results of rutin tablets.

| <b>Samples</b> | <b>Content</b>     | <b>Added</b>               | <b>Found</b>               | <b>Recovery%</b> | <b>RSD%</b>  |
|----------------|--------------------|----------------------------|----------------------------|------------------|--------------|
| <b>No.</b>     | <b>(mg/tablet)</b> | <b>(<math>\mu</math>M)</b> | <b>(<math>\mu</math>M)</b> |                  | <b>(n=3)</b> |
|                |                    | 7.5                        | 7.2                        | 96.0             | 3.5          |
| 1              | 20                 | 15.1                       | 14.8                       | 98.0             | 3.0          |
|                |                    | 30.1                       | 31.5                       | 104.6            | 2.2          |
|                |                    | 7.5                        | 7.7                        | 102.6            | 3.0          |
| 2              | 20                 | 15.1                       | 15.0                       | 99.3             | 2.5          |
|                |                    | 30.1                       | 29.0                       | 96.3             | 2.0          |
|                |                    | 7.5                        | 7.8                        | 104.0            | 2.0          |
| 3              | 20                 | 15.1                       | 14.8                       | 98.6             | 1.8          |
|                |                    | 30.1                       | 29.5                       | 98.0             | 1.5          |
